# Supplementary material
Source: MDPI journal article supplement (https://www.mdpi.com/2311-7524/9/8/888)
Supplement: s1 [file s1]

Archive with 2 entries (2 files):
- horticulturae-2520378-Supplementary Figures.pdf
- horticulturae-2520378-Supplementary tables.pdf
