# Supplementary material
Source: MDPI journal article supplement (https://www.mdpi.com/2311-7524/9/8/888)
Supplement: s1 [file s1]

Table S1 Primer sequences used for cloning, qRT-PCR, and development of InDel and SNP marker

| Primer name     | Primer sequence (5'-3')                            | Purpose                    |
|-----------------|----------------------------------------------------|----------------------------|
| P0-F            | TCTTGTTCTTCGACCCACCTA                              | For SmAPRR2-like cloning   |
| P0-R            | TCCAACCAATAATTCATCCTCA                             | For SmAPRR2-like cloning   |
| P1-F            | GCATTGAGGATGAATTATTGGGT                            | For SmAPRR2-like cloning   |
| P1-R            | GCACTTTCAAGAAATCGGAGAAC                            | For SmAPRR2-like cloning   |
| P2-F            | TAAGTGAAGGCAATAGTGATGGG                            | For SmAPRR2-like cloning   |
| P2-R            | TCAGGGCAGTCATTACTTTGAGA                            | For SmAPRR2-like cloning   |
| P3-F            | TACTGTCCAAACAAGTCCTCCTG                            | For SmAPRR2-like cloning   |
| P3-R            | GTTAAGCCCTCTACTTTCATCAG                            | For SmAPRR2-like cloning   |
| P3-1-F          | ATAAATACCTGCTCCCTCAACC                             | For SmAPRR2-like cloning   |
| P3-1-R          | AGGCACCATTTCTTCCATCTTAC                            | For SmAPRR2-like cloning   |
| P3-2-F          | GATGGAAGAAATGGTGCCTGGTT                            | For SmAPRR2-like cloning   |
| P3-2-R          | AGTATTCGAGAAGGAATGGCTTG                            | For SmAPRR2-like cloning   |
| P4-F            | AGCAACTCGGTATAGATCAAGCC                            | For SmAPRR2-like cloning   |
| P4-R            | ATCCCAGATAGTATGGTGAACCC                            | For SmAPRR2-like cloning   |
| P5-F            | TACCACGACGAAGTTGTCCGAATG                           | For SmAPRR2-like cloning   |
| P5-R            | GGGACGGTTGAGATCCCTTGCTCT                           | For SmAPRR2-like cloning   |
| P5-1-F          | TCCGAATGTTTACAAGT                                  | For SmAPRR2-like cloning   |
| P5-1-R          | GAGCAACATAGTCTCCTAGTAC                             | For SmAPRR2-like cloning   |
| P5-2-F          | TGGATTGTGAGAATGCTGAGT                              | For SmAPRR2-like cloning   |
| P5-2-R          | AGACAAATACTATGAAGGTGGG                             | For SmAPRR2-like cloning   |
| P5-3-F          | TTCTTCTTCACTGCATCCTCGTA                            | For SmAPRR2-like cloning   |
| P5-3-R          | The same as P6-R                                   | For SmAPRR2-like cloning   |
| P6-F            | AGTAAAGGAGGCAATAACCAAC                             | For SmAPRR2-like cloning   |
| P6-R            | AGAACACTCATCAGCCAAACAT                             | For SmAPRR2-like cloning   |
| 1512F           | CCCGACAGAGGAGGTGAT                                 | qRT-PCR for SmAPRR2-like   |
| 1512R           | TCCGTGGAAGGAGGTTTT                                 | qRT-PCR for SmAPRR2-like   |
| InDel79868743-F | ATAAGTATTACTCTCCCTCCCA                             | For InDel marker detection |
| InDel79868743-R | CACTCTTCATAAGGTATCCAACG                            | For InDel marker detection |
| InDel79966230-F | TTCTTAACACGAGGTGGATA                               | For InDel marker detection |
| InDel79966230-R | TTTGTCTTTCTTTTGGATG                                | For InDel marker detection |
| InDel80124212-F | GCAAAATGCTAAACGTATAAG                              | For InDel marker detection |
| InDel80124212-R | TGGACAAGTAATAACAAATG                               | For InDel marker detection |
| InDel80170780-F | TCAAACAAAGAAATACATCCC                              | For InDel marker detection |
| InDel80170780-R | TCTTGACGTAACACCTATTG                               | For InDel marker detection |
| InDel80249872-F | ACGTGGCACTCTTTGATTAG                               | For InDel marker detection |
| InDel80249872-R | TTTAATTCTAGCCACGGAGTC                              | For InDel marker detection |
| InDel80843038-F | TAACATTGATTAGTTCTCCGA                              | For InDel marker detection |
| InDel80843038-R | CTGTTTGAGGTGAGGTACTGC                              | For InDel marker detection |
| InDel80847983-F | CGAATAAGGCATAATTAGCAC                              | For InDel marker detection |
| InDel80847983-R | TGAAAGCAGAAATCACTATCG                              | For InDel marker detection |
| InDel80876526-F | AGCTAGTGCTTATTCTCTGAT                              | For InDel marker detection |
| InDel80876526-R | TGGACATCTCAAAATAGTACA                              | For InDel marker detection |
| SNP80264032-F   | CTTAATATGTGTATATTACTTCATAAATTTAAT                  | For SNP detection          |
| SNP80264032-Rt  | GAAGGTGACCAAGTTCATGCTTAGTTTCTGGATTCACTCCTTCAT      | For SNP "A" detection      |
| SNP80264032-Rc  | GAAGGTCGGAGTCAACGGATTAGTTTCTGGATTCACTCCTTCAC       | For SNP "G" detection      |
| SNP80550804-F   | CAGAAACAACATAAGCTTTCAGGAA                          | For SNP detection          |
| SNP80550804-Rg  | GAAGGTGACCAAGTTCATGCTATTCAACTTTAGGAGTATTACTAAGGTG  | For SNP "C" detection      |
| SNP80550804-Rt  | GAAGGTCGGAGTCAACGGATTAATCAACTTTAGGAGTATTACTAAGGTTT | For SNP "A" detection      |
| SNP80595470-F   | GATAAGGGTTCTTGATGGACTGAT                           | For SNP detection          |
| SNP80595470-Rg  | GAAGGTGACCAAGTTCATGCTGGTCTCATCTTACCATTTTCGG        | For SNP "C" detection      |
| SNP80595470-Ra  | GAAGGTCGGAGTCAACGGATTATCAAGTAATTATAAATTGGAGCACAT   | For SNP "T" detection      |
| SNP80609293-Fc  | GAAGGTGACCAAGTTCATGCTATCAAGTAATTATAAATTGGAGCACAC   | For SNP "C" detection      |
| SNP80609293-Ft  | GAAGGTCGGAGTCAACGGATTATCAAGTAATTATAAATTGGAGCACAT   | For SNP "T" detection      |
| SNP80609293-R   | ACACCTAATTTAGTGTTTACAACCTCAA                       | For SNP detection          |
| SNP80724027-F   | ACCAGACCTGATGATGGTGAGA                             | For SNP detection          |
| SNP80724027-Rg  | GAAGGTGACCAAGTTCATGCTCCAGTATGGGTCAGGCTTCG          | For SNP "C" detection      |
| SNP80724027-Ra  | GAAGGTCGGAGTCAACGGATTCCAGTATGGGTCAGGCTTCA          | For SNP "T" detection      |

Table S2 The results of re-sequencing for two parents and two bulks

| Sample               | G (19143)   | W (19141)  | 20183G-bulk | 20183W-bulk |
|----------------------|-------------|------------|-------------|-------------|
| Total_reads          | 191,010,178 | 78,028,336 | 195,643,032 | 254,650,172 |
| Clean reads          | 95,505,089  | 39,014,168 | 97,821,516  | 127,325,086 |
| Q30 (%)              | 92.46       | 94.44      | 92.85       | 93.22       |
| Average depth        | 23          | 8          | 23          | 31          |
| Coverage ratio-1 (%) | 90.42       | 89.77      | 90.42       | 90.58       |
| Mapped (%)           | 99.59       | 99.09      | 99.52       | 99.63       |
| Properly mapped (%)  | 96.69       | 94.71      | 97.2        | 97.56       |

Table S3 The detection data of the InDel and SNP markers in F2 recombinant plants

| Code | Pee Icolor | InDel79868743 | "InDel79966230 | InDel80124212 | InDel80170780 | InDel80249872 | SNP8026403 | SNP80550804 | SNP80595470 | SNP80609293 | SNP80724027 | InDel80843038 | InDel80847983 | InDel80876526 |
|------|------------|---------------|----------------|---------------|---------------|---------------|------------|-------------|-------------|-------------|-------------|---------------|---------------|---------------|
| 9    | green      | B             | B              | B             | B             | B             | B          | B           | H           | H           | H           | H             | H             | H             |
| 13   | green      | B             | B              | B             | B             | B             | B          | H           | H           | H           | H           | H             | H             | H             |
| 48   | green      | B             | B              | B             | B             | H             | H          | H           | H           | H           | H           | H             | H             | H             |
| 218  | green      | B             | B              | B             | B             | H             | H          | H           | H           | H           | H           | H             | H             | H             |
| 219  | green      | B             | B              | B             | H             | H             | H          | H           | H           | H           | H           | H             | H             | H             |
| 172  | green      | B             | B              | H             | H             | H             | H          | H           | H           | H           | H           | H             | H             | H             |
| 44   | green      | B             | B              | H             | H             | H             | H          | H           | H           | H           | H           | H             | H             | H             |
| 52   | green      | B             | H              | H             | H             | H             | H          | H           | H           | H           | H           | H             | H             | H             |
| 127  | green      | H             | H              | H             | H             | H             | H          | H           | H           | H           | B           | B             | B             | H             |
| 167  | green      | H             | H              | H             | H             | H             | H          | H           | H           | H           | B           | B             | B             | B             |
| 14   | white      | B             | B              | B             | B             | B             | B          | B           | B           | B           | H           | H             | H             | H             |
| 156  | white      | B             | B              | B             | B             | B             | B          | B           | B           | B           | H           | H             | H             | H             |
| 188  | white      | B             | B              | B             | B             | B             | B          | B           | B           | B           | H           | H             | H             | H             |
| 256  | white      | B             | B              | B             | B             | B             | B          | B           | B           | B           | H           | H             | H             | H             |
| 91   | white      | B             | B              | B             | B             | B             | B          | B           | B           | B           | B           | B             | B             | H             |
| 264  | white      | B             | B              | B             | B             | B             | B          | B           | B           | B           | B           | B             | B             | H             |
| 102  | white      | H             | H              | H             | H             | H             | H          | B           | B           | B           | B           | B             | B             | B             |
| 216  | white      | H             | H              | H             | H             | H             | H          | B           | B           | B           | B           | B             | B             | B             |
| 252  | white      | H             | H              | H             | H             | H             | H          | B           | B           | B           | B           | B             | B             | B             |

Note: A indicated the detection result is identical with white-peels parent 19141, B indicated the detection result is identical with green-peels parent 19143, H indicated the detection result identical with green peels hybrid F1, and yellow shading indicated that the individual plant was not a recombinant plant detected with corresponding marker.

Table S4 Amplification and sequencing results of SmAPRR2-Like gene

| Template      | 19141 cDNA |             | 19141 DNA |             | 19143 cDNA |             | 19143 DNA |             |
|---------------|------------|-------------|-----------|-------------|------------|-------------|-----------|-------------|
| Primer        | Product    | Length (bp) | Product   | Length (bp) | Product    | Length (bp) | Product   | Length (bp) |
| P0-F/P0-R     | +          | 224         | +         | 740         | +          | 224         | +         | 740         |
| P1-F/P1-R     | +          | 250         | +         | 1254        | +          | 250         | +         | 1254        |
| P2-F/P2-R     | +          | 655         | +         | 1056        | +          | 655         | +         | 1056        |
| P3-F/P3-R     | -          | -           | -         | -           | +          | 327         | +         | 705         |
| P4-F/P4-R     | -          | -           | +         | 623         | +          | 330         | +         | 636         |
| P5-F/P5-R     | -          | -           | -         | -           | +          | 379         | +         | 1303        |
| P6-F/P6-R     | -          | -           | -         | -           | +          | 393         | +         | 393         |
| P3-1-F/P3-1-R |            |             | +         | 403         |            |             | +         | 403         |
| P3-2-F/P3-2-R |            |             | -         | -           |            |             | +         | 461         |
| P5-1-F/P5-1-R |            |             | -         | -           |            |             | +         | 600         |
| P5-2-F/P5-2-R |            |             | -         | -           |            |             | +         | 542         |
| P5-3-F/P5-3-R |            |             | -         | -           |            |             | +         | 678         |
| P4-F/P5-1-R   |            |             | -         | -           |            |             | +         | 1193        |
| P-2-F/P4--R   |            |             | -         | -           |            |             | +         | 2206        |

Note: "+" meant that PCR product was amplified, "-" meant no PCR product was amplified, and blank meant no PCR has been performed.

Table S5 Detection results of functional markers based on *SmAPRR2* Like in natural population

| Code | Accession | Origin   | Peel color | Result | Code | Accession | Origin    | Peel color | Result |
|------|-----------|----------|------------|--------|------|-----------|-----------|------------|--------|
| 1    | A03       | China    | white      | -      | 41   | CK3       | China     | green      | +      |
| 2    | B12       | China    | white      | -      | 42   | E4557     | China     | green      | +      |
| 3    | A06       | China    | white      | -      | 43   | CK4       | China     | green      | +      |
| 4    | A26       | China    | white      | -      | 44   | BIY2      | China     | green      | +      |
| 5    | 21256     | Thailand | white      | -      | 45   | 21420     | China     | green      | +      |
| 6    | 21260     | Vietnam  | white      | +      | 46   | 21421     | China     | green      | +      |
| 7    | 21393     | China    | white      | +      | 47   | 21261     | Vietnam   | green      | +      |
| 8    | 21359     | China    | white      | -      | 48   | 21263     | Vietnam   | green      | +      |
| 9    | 21345     | China    | white      | -      | 49   | 21267     | Thailand  | green      | +      |
| 10   | 21341     | China    | white      | -      | 50   | 21268     | Vietnam   | green      | +      |
| 11   | 21344     | China    | white      | -      | 51   | 21284     | China     | green      | +      |
| 12   | 20013     | Thailand | white      | -      | 52   | 21281     | China     | green      | +      |
| 13   | A20       | China    | white      | -      | 53   | 21282     | China     | green      | +      |
| 14   | A22       | China    | white      | -      | 54   | 21310     | China     | green      | +      |
| 15   | B24       | China    | white      | -      | 55   | 21311     | Indonesia | green      | +      |
| 16   | A08       | China    | white      | -      | 56   | 21307     | China     | green      | +      |
| 17   | BAIY 2    | China    | white      | -      | 57   | 21374     | China     | green      | +      |
| 18   | CK2       | China    | white      | -      | 58   | 21358     | China     | green      | +      |
| 19   | B17       | China    | white      | -      | 59   | 21340     | China     | green      | +      |
| 20   | E4403     | China    | white      | -      | 60   | 21339     | China     | green      | +      |
| 21   | E4704     | China    | white      | -      | 61   | 44581     | China     | green      | +      |
| 22   | E4705     | China    | white      | -      | 62   | 44612     | China     | green      | +      |
| 23   | E4706     | China    | white      | -      | 63   | 44640     | China     | green      | +      |
| 24   | E2823     | China    | white      | -      | 64   | 44671     | China     | green      | +      |
| 25   | 19142     | China    | white      | +      | 65   | 44701     | China     | green      | +      |
| 26   | 19141     | China    | white      | -      | 66   | 44732     | China     | green      | +      |
| 27   | 19143     | China    | green      | +      | 67   | 44762     | China     | green      | +      |
| 28   | 19144     | China    | green      | +      | 68   | 44793     | China     | green      | +      |
| 29   | 19145     | China    | green      | +      | 69   | 44824     | China     | green      | +      |
| 30   | 19146     | China    | green      | +      | 70   | 20003     | China     | green      | +      |
| 31   | A04       | China    | green      | +      | 71   | 20012     | China     | green      | +      |
| 32   | B14       | China    | green      | +      | 72   | CK7       | China     | green      | +      |
| 33   | B15       | China    | green      | +      | 73   | 20100     | China     | green      | +      |
| 34   | A05       | China    | green      | +      | 74   | 20101     | China     | green      | +      |
| 35   | A10       | China    | green      | +      | 75   | 20102     | China     | green      | +      |
| 36   | A14       | China    | green      | +      | 76   | 20099     | China     | green      | +      |
| 37   | A23       | China    | green      | +      | 77   | CK6       | China     | green      | +      |
| 38   | A15       | China    | green      | +      | 78   | A21       | China     | green      | +      |
| 39   | BY1       | China    | green      | +      | 79   | B21       | China     | green      | +      |
| 40   | B22       | China    | green      | +      | 80   | B25       | China     | green      | +      |

Note: "+" meant 706bp and 1303bp target bands are amplified, and "-" meant no target bands are amplified.
