# Supplementary material
Source: MDPI journal article supplement (https://www.mdpi.com/2311-7524/9/8/888)
Supplement: s1 [file s1]

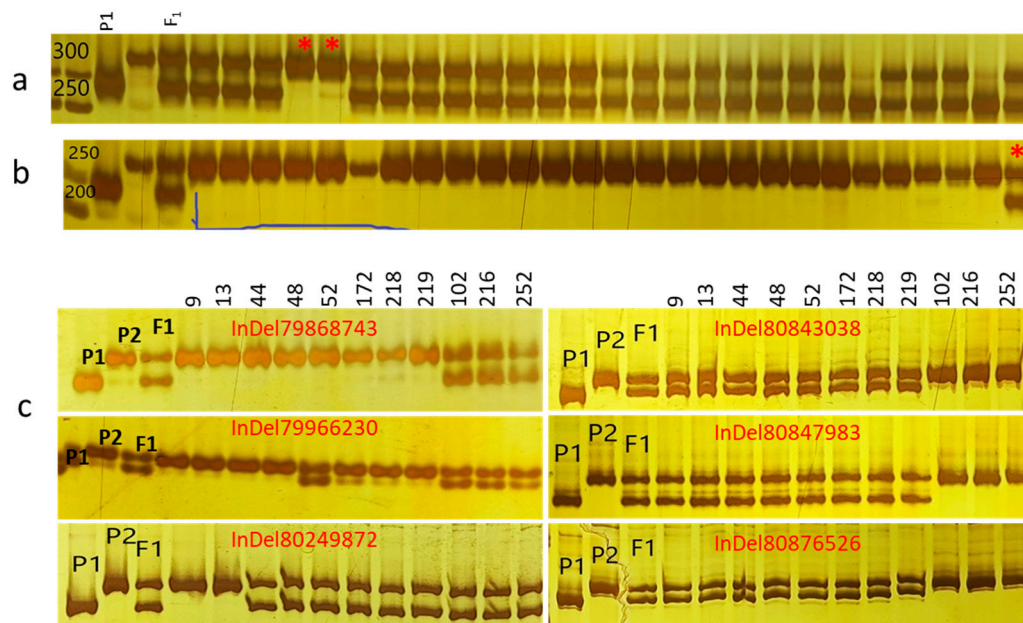

**Figure S1. Detection results of InDel markers by PAGE gel electrophoresis.**

a is the detection result of InDel79868743 marker in green-peel plants of  $F_2$  population; b is the detection result of InDel79868743 marker in white-peel plants of  $F_2$  population. P1 represented 19141, P2 represented 19143, and F1 was 20183  $F_1$ . 9, 13, 44, 48, 52, 172, 218, 219, 102, 216 and 252 were the code of part recombinant plants between marker InDel79868743 and marker InDel80876526.

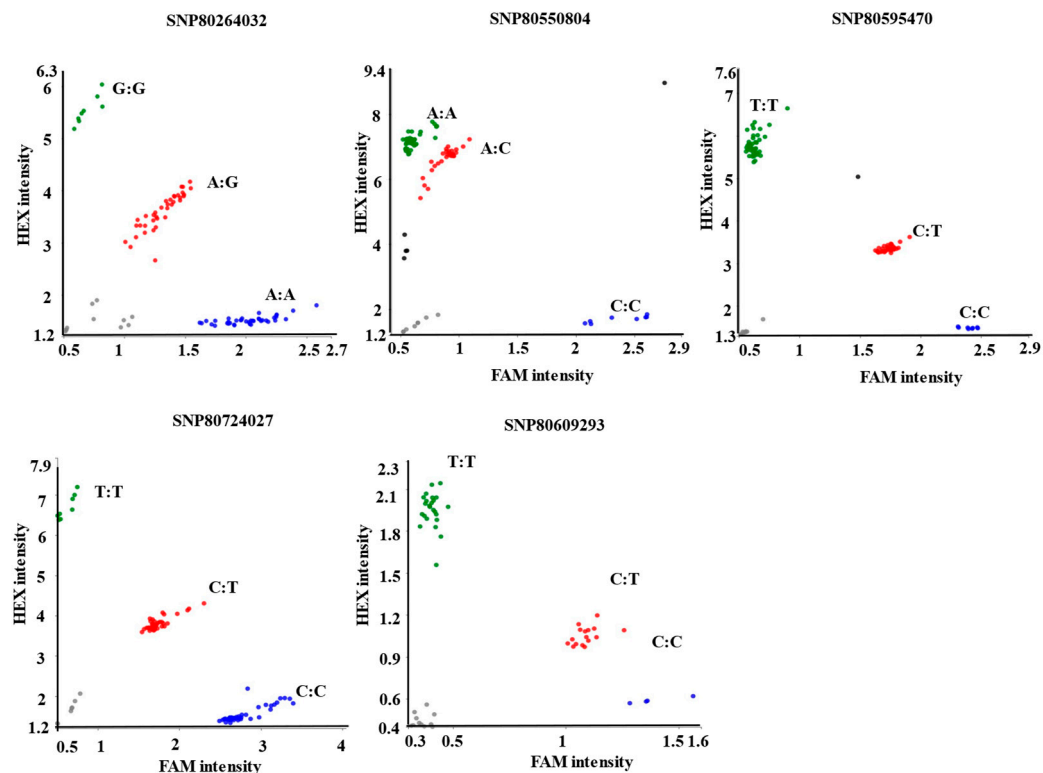

**Figure S2. SNP genotyping by PARMS technology.**

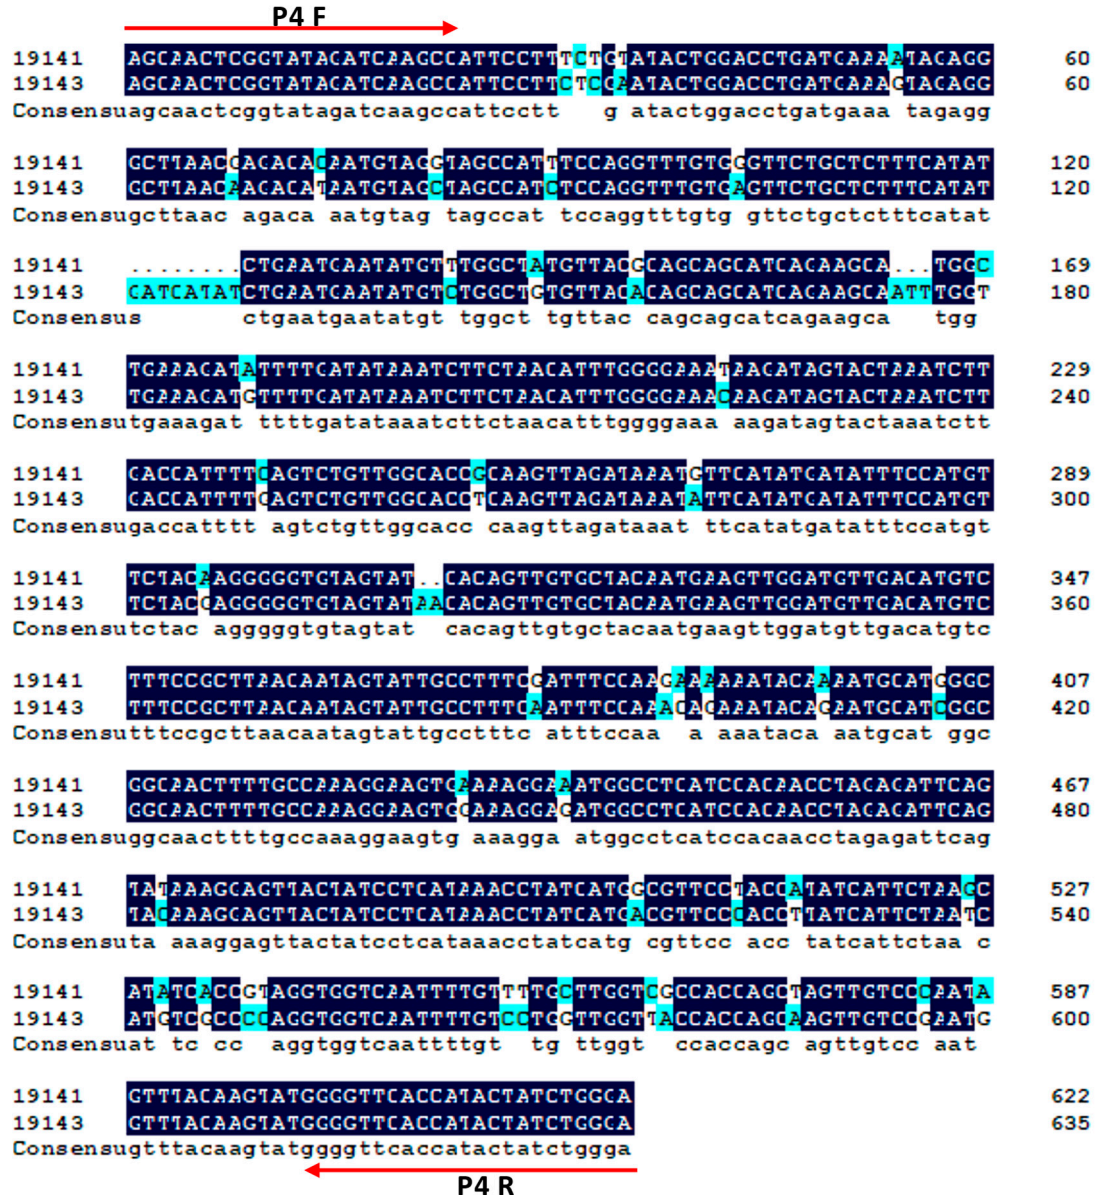

Figure S3. Sequence difference between 19141 and 19143 amplified with P4 primer combination.

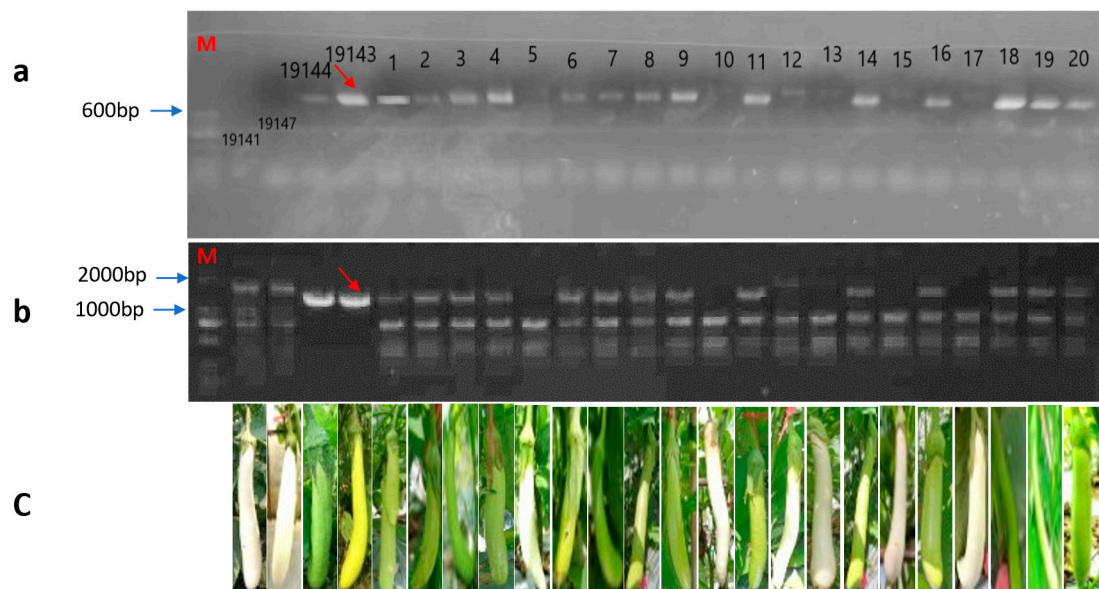

**Figure S4.** Amplification results of primer combination P3 and P5 for *SmAPRR2-Like* gene in 20183 F<sub>2</sub> population.

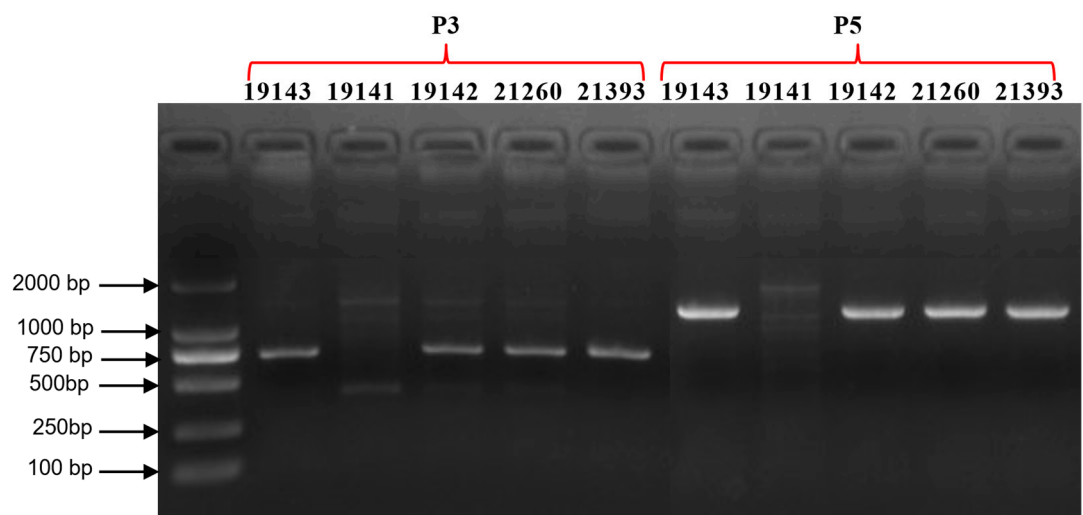

**Figure S5.** Amplification results of primer combination P3 and P5 for *SmAPRR2-Like* gene in three special white fruit accessions (19142, 21260 and 21393).
